# Supplementary material for: Bioactive Molecules of Mandarin Seed Oils Diminish Mycotoxin and the Existence of Fungi
Source: MDPI journal article supplement (doi:10.3390/molecules26237130), 2021-11-25
Supplement: s1 [file s1]

**Supplementary materials for** Manuscript ID : molecules-1479967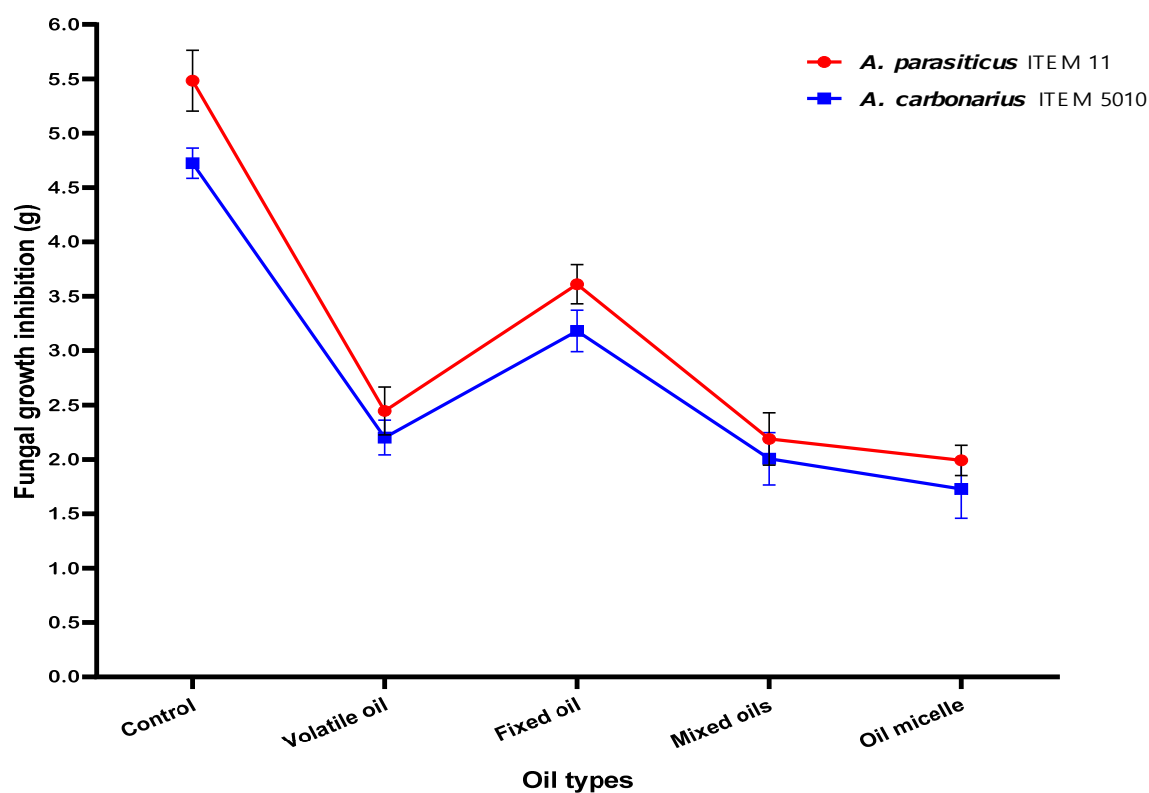

**Figure S1.** The reduction of the toxigenic fungal growth for the mycelia of two strains of *Aspergillus* fungi known to produce mycotoxin in their growth media.

- *A. parasiticus* ITEM 11: represents the reduction of the *Aspergillus parasiticus* strain due to the treatment by oil types.
- *A. carbonarius* ITEM 5010: represents the reduction of the *Aspergillus carbonarius* strain due to the treatment by oil types.
